# Supplementary material for: Frontline treatments in extremely elderly patients with diffuse large B-cell lymphoma: a population-based study in Taiwan, 2010–2015
Source: PubMed Central journal article supplement (PMC7285734; doi:10.1186/s12979-020-00188-8), 2020-06-10
Supplement: 12979_2020_188_MOESM1_ESM.pdf [file 12979_2020_188_MOESM1_ESM.pdf]

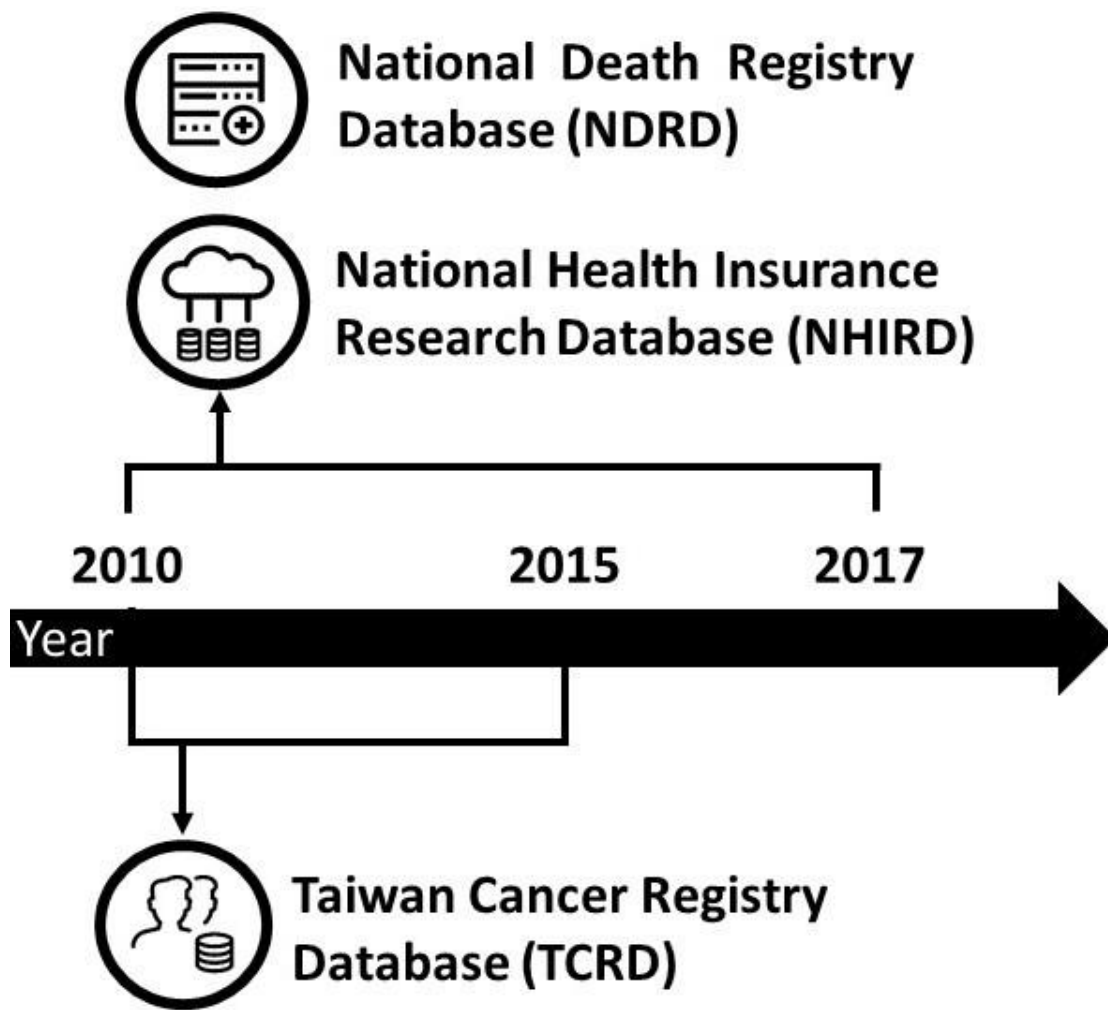

Supplementary Figure 1. The illustration of study period

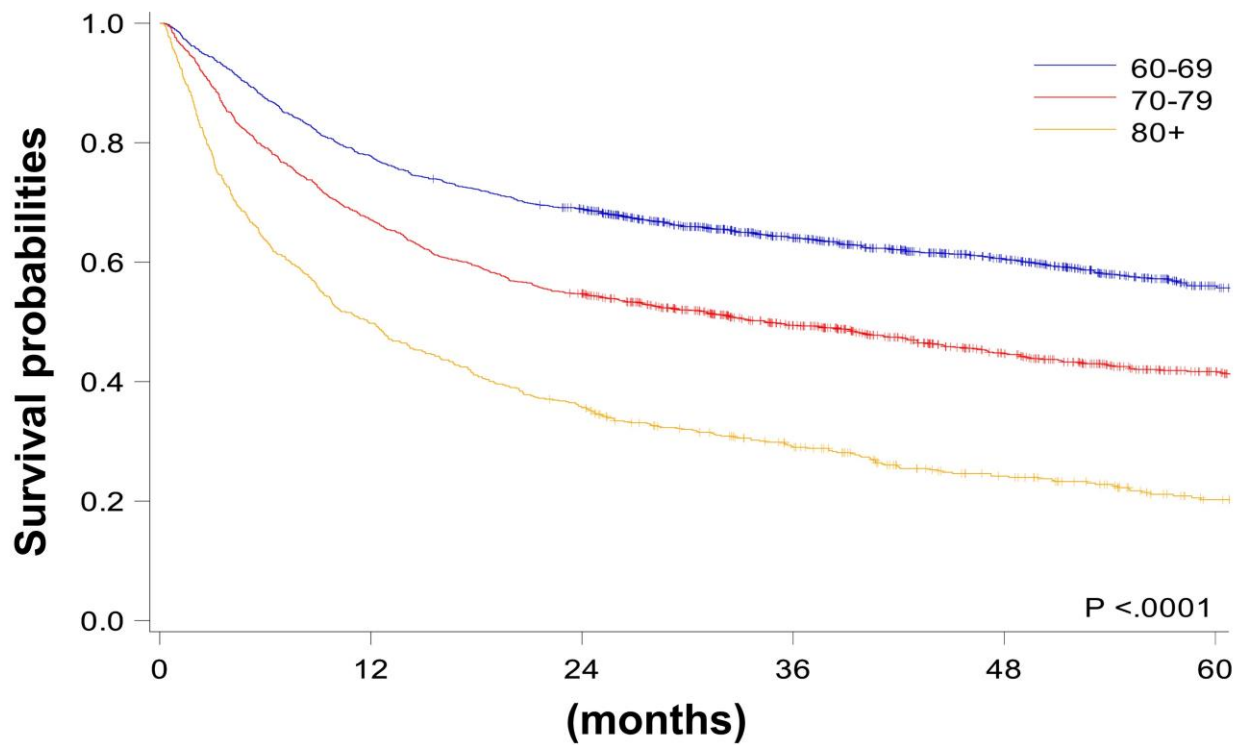

| Age group | N    | Survival Probabilities |        |        |        |        | Survival Time (month) |                   |         |
|-----------|------|------------------------|--------|--------|--------|--------|-----------------------|-------------------|---------|
|           |      | 1y                     | 2y     | 3y     | 4y     | 5y     | Median                | 95% CI for Median | P-value |
| 60-69     | 1335 | 0.7775                 | 0.6891 | 0.6404 | 0.6050 | 0.5605 | NR                    | (76.56,.)         | <0.0001 |
| 70-79     | 1224 | 0.6708                 | 0.5474 | 0.4942 | 0.4467 | 0.4168 | 34.52                 | (27.80,42.49)     |         |
| 80+       | 669  | 0.4978                 | 0.3572 | 0.2901 | 0.2419 | 0.2024 | 11.84                 | (9.70,14.07)      |         |

**Supplementary Figure 2.** Overall survival of the patient with DLBCL diagnosed between 2010 and 2015. NR, not reached.

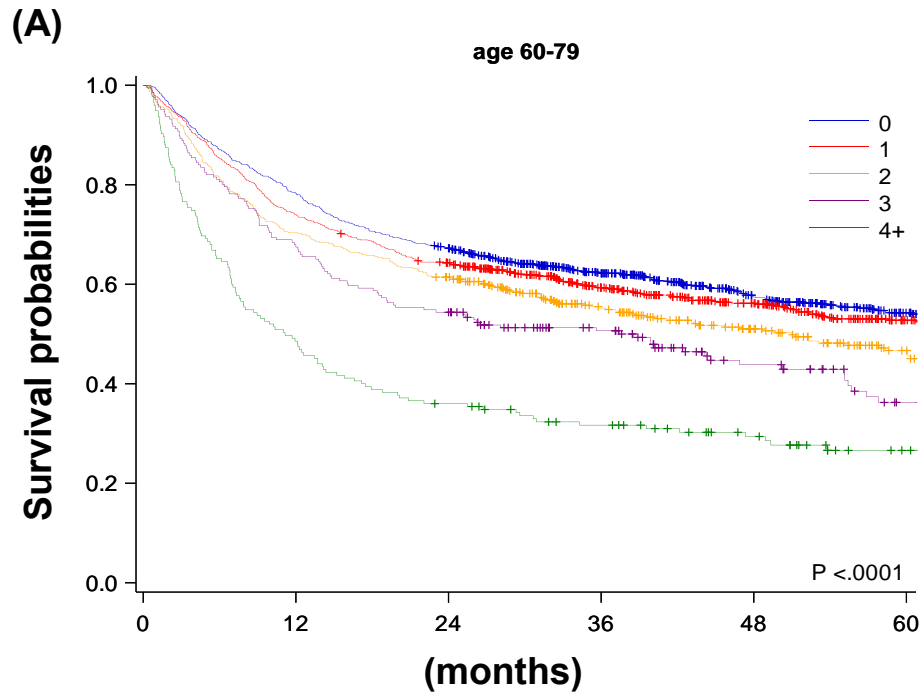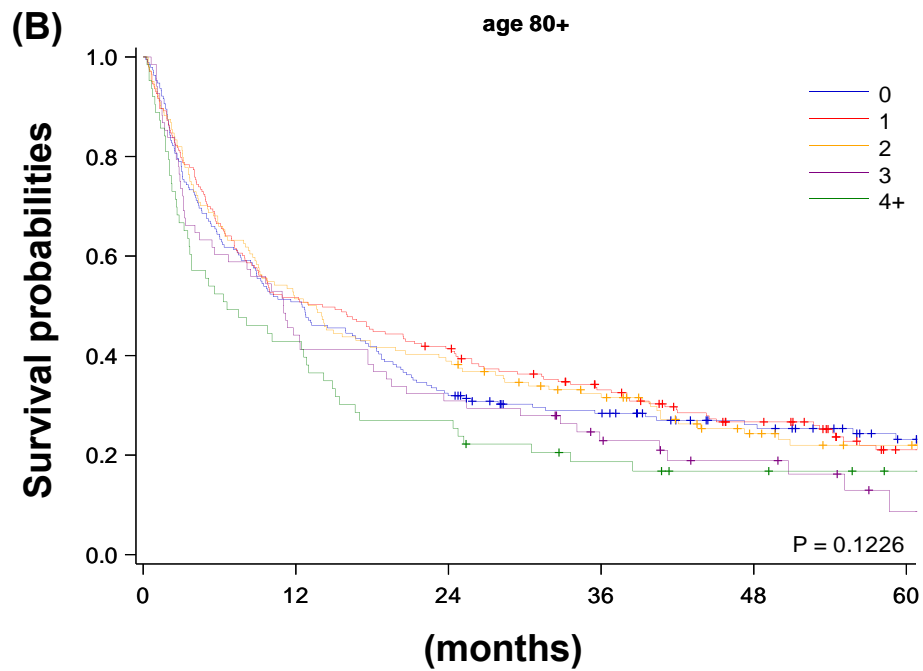

**Supplementary Figure 3.** Overall survival according to the Charlson comorbidity index score. **(A)** Patients aged between 60 and 79 years, **(B)** Patients older than 80 years.

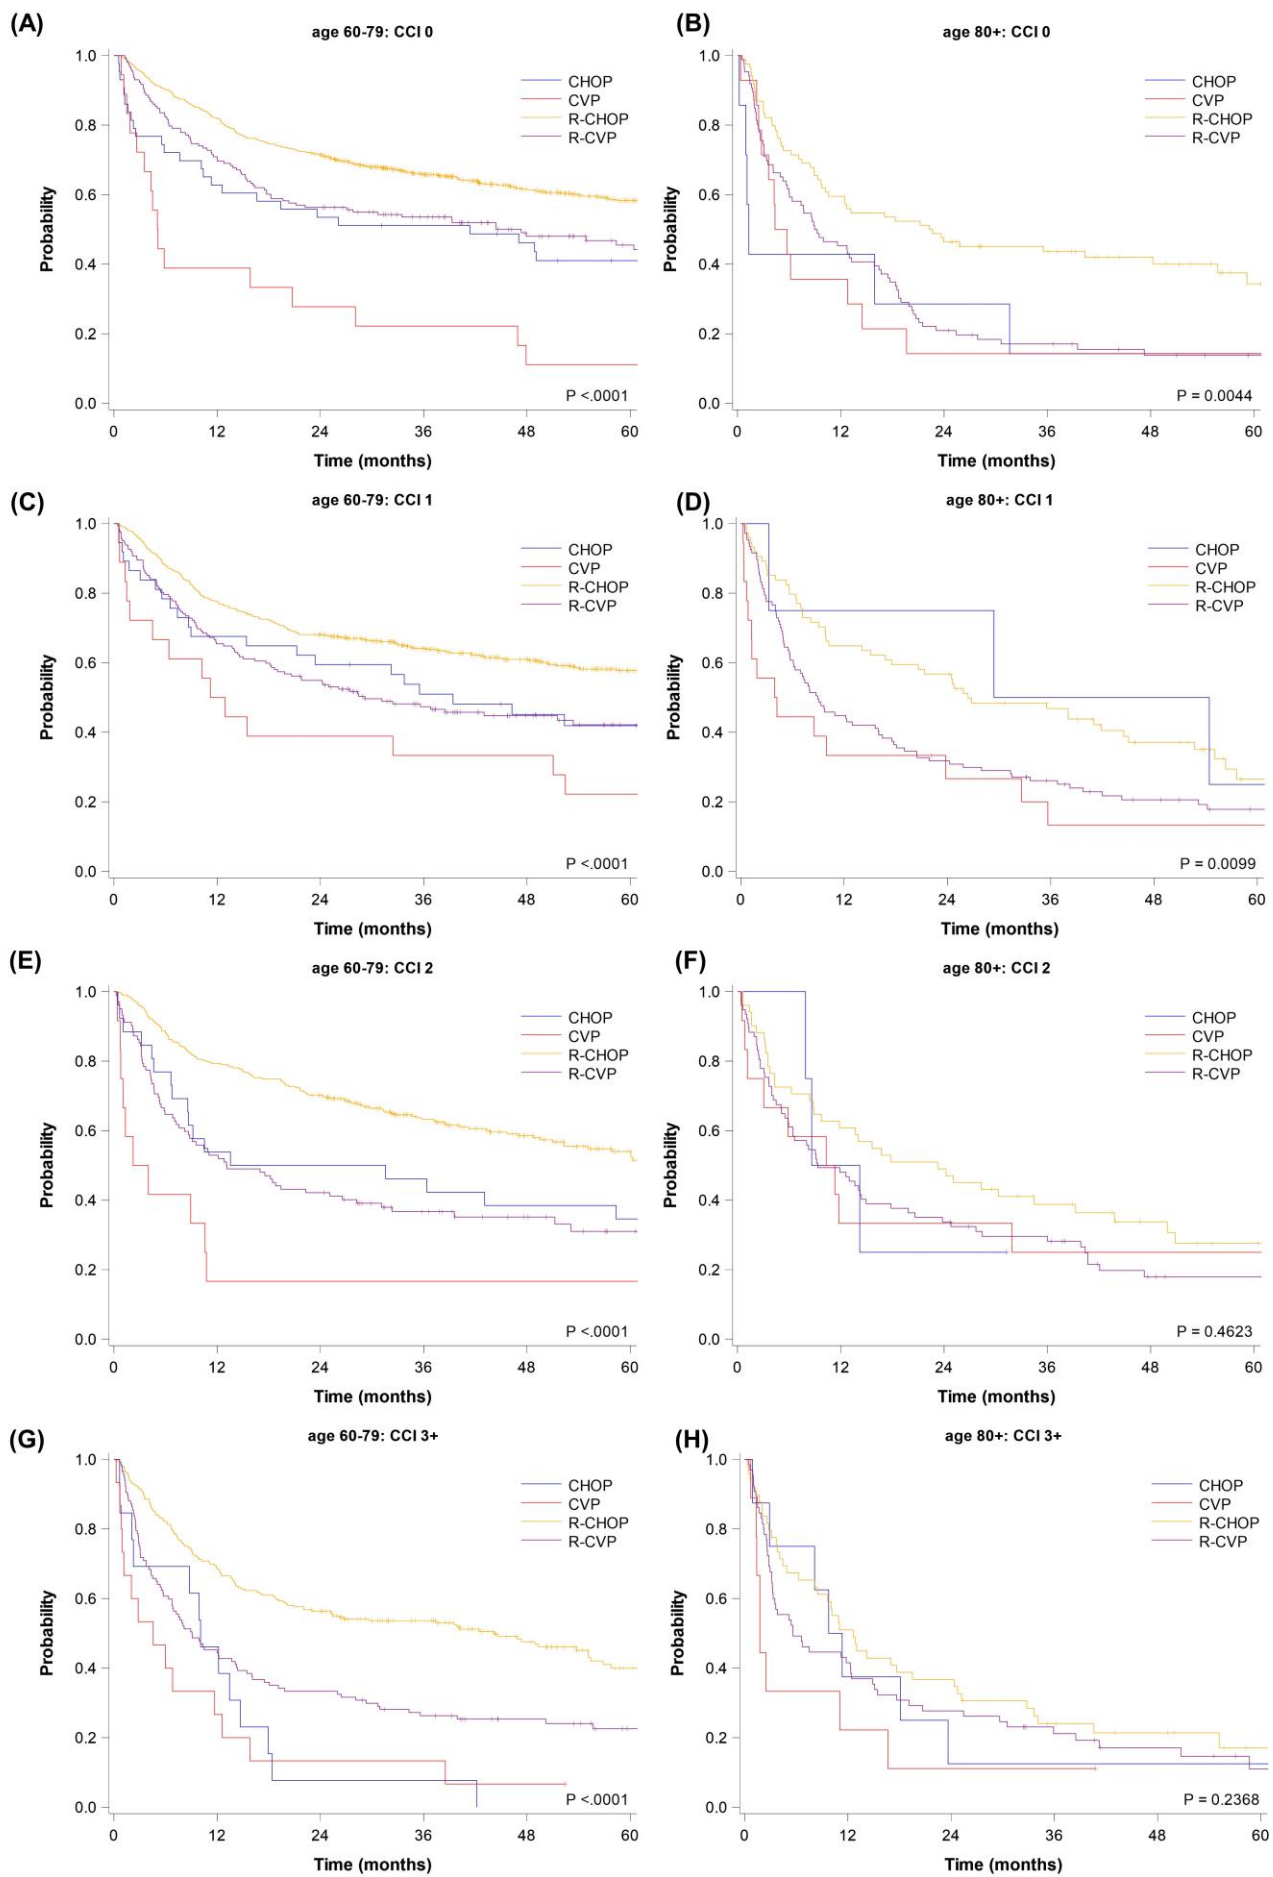

**Supplementary Figure 4.** Overall survival. Patients were stratified according to the type

of induction chemotherapy in each group. **(A)** Patients aged between 60 and 79 years with CCI score 0, **(B)** Patients older than 80 years with CCI score 0, **(C)** Patients aged between 60 and 79 years with CCI score 1, **(D)** Patients older than 80 years with CCI score 1, **(E)** Patients aged between 60 and 79 years with CCI score 2, **(F)** Patients older than 80 years with CCI score 2, **(G)** Patients aged between 60 and 79 years with CCI score 3+, **(H)** Patients older than 80 years with CCI score 3+.

**Supplementary Table 1. Details of Carlson comorbidity index**

| Variable                                     | All patients<br>(N=3228) |        | Aged<br>between 60<br>and 79 years<br>(N=2559) |        | Aged more<br>than 80 years<br>(N=669) |        | p-value |
|----------------------------------------------|--------------------------|--------|------------------------------------------------|--------|---------------------------------------|--------|---------|
|                                              | n                        | (%)    | n                                              | (%)    | n                                     | (%)    |         |
| <b>Myocardial infarction</b>                 | 28                       | (0.9)  | 22                                             | (0.9)  | 6                                     | (0.9)  | 0.9265  |
| <b>Congestive Heart failure</b>              | 189                      | (5.9)  | 117                                            | (4.6)  | 72                                    | (10.8) | <0.0001 |
| <b>Peripheral vascular</b>                   | 70                       | (2.2)  | 55                                             | (2.1)  | 15                                    | (2.2)  | 0.8833  |
| <b>Cerebrovascular disease</b>               | 358                      | (11.1) | 252                                            | (9.8)  | 106                                   | (15.8) | <0.0001 |
| <b>Dementia</b>                              | 80                       | (2.5)  | 36                                             | (1.4)  | 44                                    | (6.6)  | <0.0001 |
| <b>Chronic pulmonary disease</b>             | 428                      | (13.3) | 299                                            | (11.7) | 129                                   | (19.3) | <0.0001 |
| <b>Rheumatic</b>                             | 119                      | (3.7)  | 98                                             | (3.8)  | 21                                    | (3.1)  | 0.3986  |
| <b>Peptic ulcer disease</b>                  | 759                      | (23.5) | 590                                            | (23.1) | 169                                   | (25.3) | 0.2310  |
| <b>Mild liver disease</b>                    | 459                      | (14.2) | 401                                            | (15.7) | 58                                    | (8.7)  | <0.0001 |
| <b>Moderate or severe liver disease</b>      | 14                       | (0.4)  | 10                                             | (0.4)  | 4                                     | (0.6)  | 0.4679  |
| <b>Diabetes without chronic complication</b> | 776                      | (24.0) | 625                                            | (24.4) | 151                                   | (22.6) | 0.3181  |
| <b>Diabetes with chronic complication</b>    | 197                      | (6.1)  | 160                                            | (6.3)  | 37                                    | (5.5)  | 0.4874  |
| <b>Hemiplegia or paraplegia</b>              | 29                       | (0.9)  | 26                                             | (1.0)  | 3                                     | (0.4)  | 0.1660  |
| <b>Renal disease</b>                         | 198                      | (6.1)  | 135                                            | (5.3)  | 63                                    | (9.4)  | <0.0001 |

**Supplementary Table 2. The M-code of diagnosis in this study**

| <b>M-code</b> | <b>ICD-O-3 Morphology</b>                                       |
|---------------|-----------------------------------------------------------------|
| 96803         | ML, large B-cell, diffuse                                       |
| 96843         | ML, large B-cell, diffuse, immunoblastic, NOS                   |
| 96883         | T-cell histiocyte rich large B-cell lymphoma                    |
| 97123         | Intravascular large B-cell lymphoma                             |
| 97373         | ALK positive large B-cell lymphoma                              |
| 97353         | Plasmablastic lymphoma                                          |
| 97383         | Lrg B-cell lymphoma in HHV8-assoc. multicentric<br>Castleman DZ |

**Supplementary Table 3. The payment code and name of radiotherapy**

| <b>Payment code</b> | <b>Name</b>                                          |
|---------------------|------------------------------------------------------|
| 36006B              | cobalt 60 teletherapy—each portal, simple            |
| 36009B              | Cobalt 60 teletherapy, each portal, complicated      |
| 36010B              | Emergent cobalt 60 teletherapy, each portal          |
| 36011B              | Linear accelerator teletherapy, each simple portal   |
| 36012B              | Linear accelerator teletherapy, each complex portal  |
| 36013B              | Emergent linear accelerator teletherapy, each portal |
| 36018B              | Simulation procedure                                 |
| 36019B              | Dosimetry                                            |
| 37010B              | Interstitial brachytherapy                           |
